# Supplementary material
Source: Springer Nature journal article supplement (https://www.springermedizin.de/resource/supplementary/12876_2008_307_MOESM1_ESM.pdf/9439126)
Supplement: MOESM1 [file 9439126]

497 published papers  
identified and screened

319 potentially relevant  
records screened by  
two reviewers

22 records retrieved for  
more detailed evaluation

14 potentially appropriate  
RCTs to be included in the  
systematic review

178 duplicate records excluded

297 records excluded because  
clearly not relevant

8 records excluded because did  
not meet detailed inclusion criteria
